# Supplementary material
Source: PubMed Central journal article supplement (PMC406440)

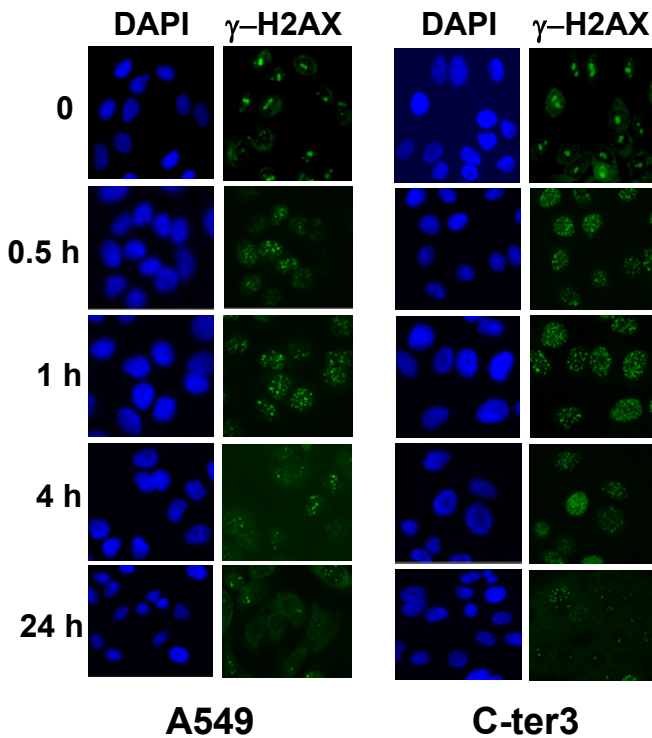

Supplement: pnas_101_18_6905__1.pdf [file pnas_101_18_6905__1.pdf]
